# Supplementary material for: Loss of BubR1 acetylation causes defects in spindle assembly checkpoint signaling and promotes tumor formation
Source: PubMed Central journal article supplement — J Cell Biol. 2013 Jul 22;202(2):295–309. doi: 10.1083/jcb.201210099 (PMC3718975; doi:10.1083/jcb.201210099), 2013-07-22
Supplement: supp_jcb.201210099_JCB_201210099_sm.pdf [file supp_jcb.201210099_JCB_201210099_sm.pdf]

Park et al., <http://www.jcb.org/cgi/content/full/jcb.201210099/DC1>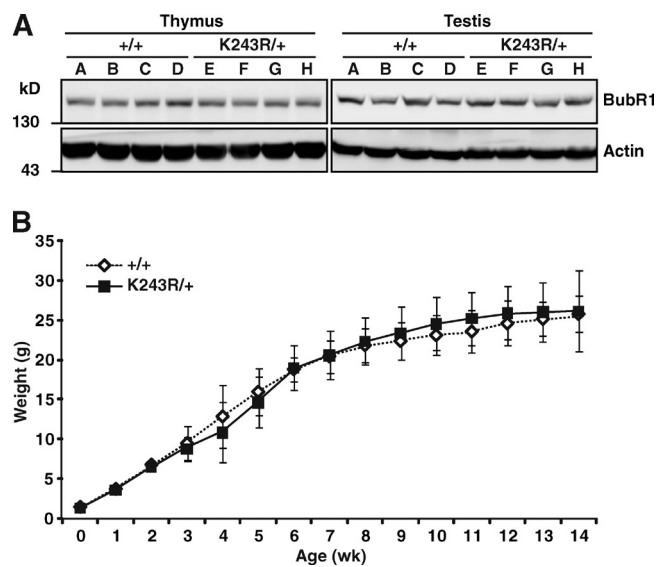

Figure S1. **Analysis of *K243R/+* knock-in mice.** (A) WB analysis of BubR1 protein levels in the thymus and testis. (B) Body weight analysis of WT ( $n = 50$ ) and *K243R/+* ( $n = 130$ ). SDs are shown in error bars.

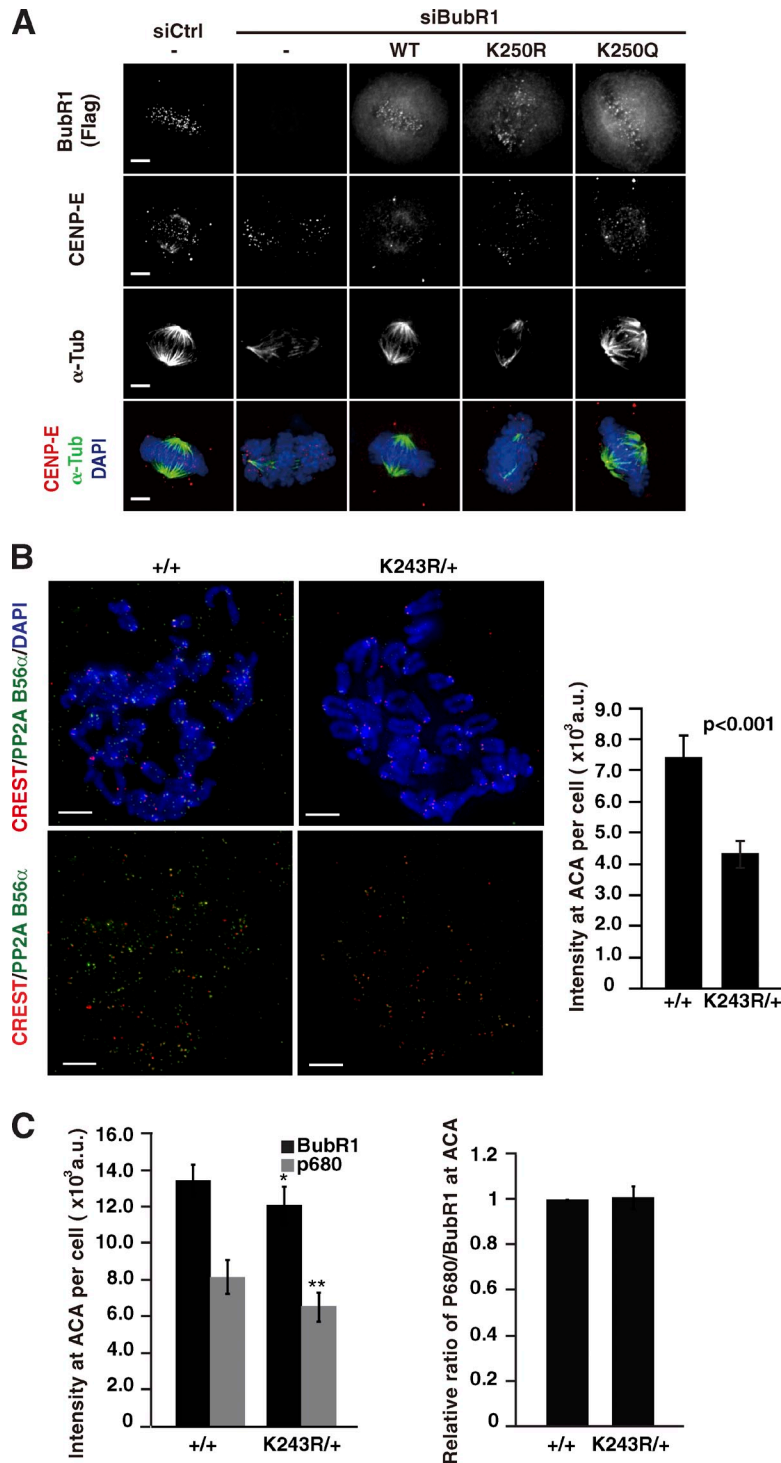

Figure S2. **BubR1 acetylation is involved in proper chromosome congression.** (A) Acetylation-mimetic form of BubR1 (K250Q) is capable of rescuing the defects of KT–MT interaction in BubR1-depleted cells. HeLa-FRT-BubR1, -K250R, or -K250Q cells were depleted of endogenous BubR1 by siRNA transfection targeting 3'-UTR. The expression of indicated FLAG-tagged BubR1 constructs was induced by doxycycline treatment. Then they were subjected to cold MT assay after treating cells with MG132 for 1 h. Immunofluorescence assay was performed with anti-BubR1 or anti-FLAG (M2), anti-CENP-E, and anti-tubulin antibodies. Representative metaphase cells are shown (siCtrl,  $n = 11$ ; siBubR1,  $n = 15$ ; siBubR1 + WT,  $n = 10$ ; siBubR1 + K250R,  $n = 15$ ; siBubR1 + K250Q,  $n = 12$ ). Bars, 5  $\mu$ m. (B) PP2A-B56 $\alpha$  recruitment to KTs in WT and K243R/+ MEFs. Metaphase chromosome spreads were coupled with immunofluorescence assay. Immunofluorescence assay was performed with anti-CREST and anti-PP2A-B56 $\alpha$ . The result is from two independent experiments of 27 cells in each setting (mean  $\pm$  SEM;  $n > 450$  KTs). Bars, 5  $\mu$ m. (C) Relative intensity of p680 BubR1 at KTs of prometaphase cells. MEFs were treated with 200 ng/ml nocodazole and 10  $\mu$ M Mg132 for 2 h before fixation. Immunofluorescence assay was performed with anti-CREST, anti-p680 BubR1, and anti-BubR1 antibodies. The result is from two independent experiments of 37 cells in each setting (mean  $\pm$  SEM;  $n > 350$  KTs). Asterisks mark significant  $p$ -values calculated by an unpaired  $t$  test (\*,  $P = 0.32$ ; \*\*,  $P = 0.18$ ). [right] Relative ratio of p680/BubR1 immunofluorescence intensities are depicted as histograms (SDs are from two independent experiments).

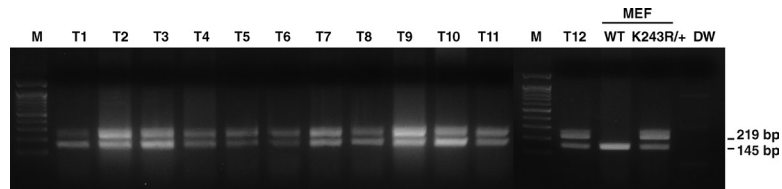

Figure S3. **Detection of WT and K243R allele in primary tumors.** PCR genotyping of *WT-BubR1* and *K243R* from 12 primary tumors obtained from the *K243R/+* mice. Genomic DNA samples from the WT and *K243R/+* MEFs served as the PCR controls.

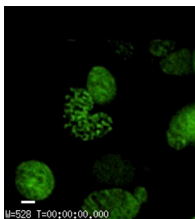

Video 1. **Live imaging of mitosis in WT MEFs.** MEFs isolated from the mice expressing *GFP-H2B* (i.e., *GFP-H2B* transgenic mice) were subjected to time-lapse video microscopy using the UPlanFL N 40x/NA 1.30 oil lens on a microscope (DeltaVision Cpre) equipped with a charge-coupled device camera in a CO<sub>2</sub> chamber at 37°C. The images were captured every 5 min using a 20x objective lens. Bar, 5 μm.

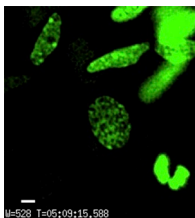

Video 2. **Mitosis in *K243R/+*; *GFP-H2B* MEFs.** The *GFP-H2B* transgenic mice were crossed with *K243R/+* mice, and the MEFs isolated from the resultant *K243R/+*; *GFP-H2B* mice were subjected to live imaging as in Video 1. The images were taken every 5 min. The chromosomes segregated without forming distinct metaphase plates. Lagging chromosomes are shown. Bar, 5 μm.

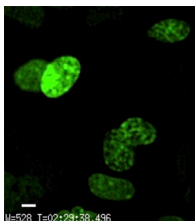

Video 3. **Mitosis in *K243R/+*; *GFP-H2B* MEFs.** The *GFP-H2B* transgenic mice were crossed with *K243R/+* mice, and the MEFs isolated from the resultant *K243R/+*; *GFP-H2B* mice were subjected to live imaging as in Video 1. The cells exited mitosis without chromosome segregation. The images were captured every 5 min. Bar, 5 μm.
